# Supplementary material
Source: MDPI journal article supplement (https://www.mdpi.com/1999-4907/14/1/151)
Supplement: s1 [file s1]

## Supplementary materials

Table S1. Variable Importance for Projection (VIP) scores of partial least square discriminant analysis (PLS-DA).

| Parameters                                                                                            | Component 1 | Component 2 |
|-------------------------------------------------------------------------------------------------------|-------------|-------------|
| D-Xylobiose                                                                                           | 3.2103      | 3.1354      |
| Oxidized glutathione (GSSG)                                                                           | 2.3955      | 2.352       |
| Dihydroxyacetone                                                                                      | 1.8116      | 1.7835      |
| Dihydroxyphenylalanine                                                                                | 1.5772      | 1.548       |
| Tyrosol                                                                                               | 1.5687      | 1.5426      |
| beta-D-Allose                                                                                         | 1.4257      | 1.3954      |
| Total glutathione                                                                                     | 1.3721      | 1.3899      |
| Piceatannol                                                                                           | 1.3537      | 1.3366      |
| Galactinol                                                                                            | 1.2514      | 1.266       |
| Lyxose                                                                                                | 1.0738      | 1.1795      |
| Malonic acid                                                                                          | 1.0368      | 1.027       |
| Alanine                                                                                               | 1.0335      | 1.0487      |
| 2-Piperidinecarboxylic acid                                                                           | 1.0247      | 1.0013      |
| Fumarate                                                                                              | 0.88113     | 0.90588     |
| N-methyl trans-4-hydroxy-L-proline (2S,4R)-4-hydroxy-1-methyl pyrrolidine-2-carboxylic acid (R002953) | 0.88095     | 0.86293     |
| Viburnitol                                                                                            | 0.86141     | 0.84091     |
| Glyceric acid                                                                                         | 0.8198      | 0.80268     |
| Catechin                                                                                              | 0.76755     | 1.0502      |
| 2-oxoglutarate                                                                                        | 0.76598     | 0.7581      |
| Cellobiitol                                                                                           | 0.73161     | 0.71427     |
| DHAR activities                                                                                       | 0.67227     | 0.66159     |
| Serine                                                                                                | 0.65204     | 0.65402     |
| H2O2                                                                                                  | 0.6364      | 0.62567     |
| Ribonic acid                                                                                          | 0.63265     | 0.63869     |
| Phosphoric acid monomethyl ester                                                                      | 0.61658     | 0.61252     |
| 4-Methylcatechol                                                                                      | 0.59535     | 0.58221     |
| soluble protein                                                                                       | 0.59201     | 0.59442     |
| Phospahte                                                                                             | 0.5068      | 0.4949      |
| Glucoheptonic acid-1,4-lactone                                                                        | 0.46508     | 0.57202     |
| Gulonic acid                                                                                          | 0.46233     | 0.45284     |
| Hydroquinone                                                                                          | 0.45855     | 0.45347     |
| D155405                                                                                               | 0.45261     | 0.4737      |
| threo-Guaiacylglycerol                                                                                | 0.44366     | 0.46561     |
| Palatinose                                                                                            | 0.4384      | 0.46062     |
| N-methyl cis-4-hydroxymethyl-L-proline                                                                | 0.4151      | 0.40752     |
| Quinic acid                                                                                           | 0.38256     | 0.38833     |
| Sulfate                                                                                               | 0.38135     | 0.37489     |
| Arabitol                                                                                              | 0.37477     | 0.3742      |
| 3-dehydro-Shikimic acid                                                                               | 0.36988     | 0.55267     |
| 4-hydroxy-Benzoic acid                                                                                | 0.33822     | 0.38318     |
| Leaf hydration                                                                                        | 0.298       | 0.29091     |
| cis-4-hydroxy-Cinnamic acid                                                                           | 0.21318     | 0.2285      |
| Sorbitol                                                                                              | 0.20214     | 0.20345     |
| Arabinose                                                                                             | 0.19134     | 0.20424     |
| Total sugar                                                                                           | 0.18976     | 0.28667     |
| Gluconic acid                                                                                         | 0.16001     | 0.19854     |
